# Supplementary material for: Identification and verification of inflammatory biomarkers for primary Sjögren’s syndrome
Source: Clin Rheumatol. 2024 Feb 20;43(4):1335–52. doi: 10.1007/s10067-024-06901-y (PMC10944815; doi:10.1007/s10067-024-06901-y)
Supplement: Supplementary file 7 — Supplementary file7 (XLSX 40 KB) [file 10067_2024_6901_MOESM7_ESM.xlsx]

## Sheet: Sheet1
Supplementary Table 3 The detailed information of DEGs between pSS and normal samples in the GSE51092 dataset
	logFC	AveExpr	t	PValue	adj.P.Val	B
CD248	-1.46811	4.23999	-5.46887	1.2072e-07	2.45945e-05	7.3031
MMP28	-1.29318	3.10888	-6.13632	3.79693e-09	3.05547e-06	10.5514
LRRN3	-1.2447	6.97764	-4.22732	3.44627e-05	0.00149924	2.04456
LOC389816	-1.23961	4.60404	-5.80537	2.18367e-08	8.59085e-06	8.90674
LOC650761	-1.22332	4.44485	-5.67339	4.30635e-08	1.29292e-05	8.26934
FEZ1	-1.14844	5.15774	-4.67137	5.16274e-06	0.000368136	3.80004
RBPMS2	-1.08396	6.03289	-5.84936	1.7372e-08	7.62298e-06	9.12157
LOC644532	-1.08283	2.91066	-5.82596	1.96229e-08	8.29177e-06	9.00713
MYOM2	-0.993637	6.32924	-2.72193	0.00700131	0.0531811	-2.75064
SERPINE2	-0.954352	5.63083	-5.63011	5.36792e-08	1.49372e-05	8.06265
NRCAM	-0.946025	1.81531	-8.68553	8.0113e-16	9.14009e-12	25.0812
GSTT1	-0.905003	5.17446	-2.51926	0.0124589	0.0766274	-3.25006
RPS4Y1	-0.902472	2.76512	-2.10871	0.0360816	0.148989	-4.14933
REEP6	-0.866055	3.45071	-7.1731	1.06217e-11	6.05915e-08	16.0975
LOC653820	-0.863002	5.35048	-2.60274	0.00986631	0.0664615	-3.04872
KIAA1324	-0.858927	7.97991	-3.57818	0.000424128	0.00845958	-0.250509
LOC644852	-0.819102	5.25397	-2.90068	0.00409491	0.0382002	-2.28027
GJA12	-0.806395	3.86613	-4.76682	3.37001e-06	0.000273681	4.19616
CPA3	-0.801867	6.18336	-2.55791	0.011191	0.0717296	-3.1576
TTC25	-0.791314	5.40104	-3.30039	0.00112349	0.0165821	-1.12926
RFX2	-0.786839	5.27945	-3.85674	0.000150264	0.00416107	0.693687
HDC	-0.775413	6.40673	-2.11472	0.0355601	0.147155	-4.13727
HGD	-0.771405	4.39945	-4.28005	2.77156e-05	0.00129593	2.24533
LOC642724	-0.767853	4.37718	-2.87485	0.00443213	0.0399172	-2.34997
TNFRSF21	-0.764434	4.51292	-3.96792	9.76622e-05	0.00304434	1.08778
EDAR	-0.764292	4.03146	-3.54184	0.000483443	0.00934848	-0.369063
ASF1B	-0.755437	6.43573	-5.08723	7.68498e-07	9.63493e-05	5.5727
SPP1	-0.749789	3.37392	-2.60205	0.00988564	0.0664615	-3.05042
CXCR6	-0.749468	5.00752	-3.80961	0.00017986	0.00469569	0.529577
FCGBP	-0.746614	6.86405	-3.93615	0.000110566	0.00329756	0.974173
C20orf103	-0.745253	3.5398	-4.87082	2.10192e-06	0.000198188	4.63514
PTGDS	-0.739759	6.90233	-3.82096	0.000172262	0.00458139	0.568956
SLC16A10	-0.732131	5.04168	-4.26206	2.9861e-05	0.00135697	2.1766
CAPN5	-0.731622	4.10569	-4.33855	2.1711e-05	0.00106768	2.47057
RPL3L	-0.731075	2.30655	-3.35631	0.00092799	0.014664	-0.957493
KISS1R	-0.728768	4.11669	-3.71384	0.000257813	0.00591828	0.201536
SAMD14	-0.727156	3.80067	-3.22618	0.0014424	0.0197082	-1.35319
DSC1	-0.726714	3.70866	-3.06694	0.00242908	0.0275754	-1.81803
TGM3	-0.718093	6.96256	-3.46323	0.000639413	0.0114702	-0.621842
COL6A2	-0.716244	3.33665	-3.21178	0.00151326	0.0202876	-1.39609
TREML1	-0.709905	5.64603	-3.27473	0.00122552	0.0175873	-1.20723
COCH	-0.707366	3.73335	-3.22358	0.00145497	0.019723	-1.36095
LOC653344	-0.702876	5.42731	-4.22477	3.48252e-05	0.001505	2.03492
IRX3	-0.698098	3.53739	-2.77428	0.00599978	0.0480024	-2.61576
THRA	-0.695921	4.36658	-5.01808	1.06361e-06	0.000122573	5.26961
C1orf183	-0.679052	3.86564	-3.14773	0.00186942	0.0231075	-1.58487
KLRC3	-0.675763	5.16578	-2.83602	0.00498681	0.0426035	-2.45364
FGF9	-0.671808	2.70074	-4.3783	1.83661e-05	0.000935443	2.62505
CAMK2N1	-0.670164	5.2427	-3.27229	0.00123565	0.0177105	-1.21462
VWCE	-0.666831	7.88574	-3.36091	0.000913409	0.0146021	-0.943246
FLJ14166	-0.662216	6.40698	-4.45883	1.30397e-05	0.000711819	2.94161
LOC642083	-0.655372	4.68986	-2.71601	0.00712356	0.053504	-2.76574
FBLN2	-0.641555	2.28172	-5.97717	8.87847e-09	5.3778e-06	9.75237
CXCL5	-0.641006	3.87398	-3.45328	0.000662228	0.0117685	-0.653488
DERPC	-0.635401	3.04804	-5.55523	7.83716e-08	1.82478e-05	7.70785
SPRYD3	-0.63446	8.17351	-4.45612	1.31914e-05	0.000714571	2.93091
TKTL1	-0.628764	5.56369	-3.99311	8.8465e-05	0.00278043	1.1784
CD8B	-0.61733	6.10314	-3.10078	0.00217811	0.02547	-1.72104
ST3GAL4	-0.616992	5.8072	-3.33293	0.00100554	0.0153782	-1.02964
TMPRSS9	-0.612334	6.39862	-2.3204	0.0212201	0.10784	-3.70461
MXI1	-0.610838	5.72261	-2.8763	0.00441251	0.0398779	-2.34607
MGC52282	-0.60457	4.36566	-2.441	0.0154235	0.0878616	-3.43315
AK5	-0.604393	3.00968	-3.37173	0.00087996	0.0142001	-0.90968
CABP5	-0.603462	4.49387	-2.54371	0.0116427	0.0735909	-3.19171
C6orf85	-0.601996	4.32428	-4.42033	1.5369e-05	0.000804333	2.78965
ALPL	-0.599779	11.3649	-4.22663	3.45605e-05	0.00149924	2.04195
RP11-529I10.4	-0.595694	4.89756	-2.9523	0.00349041	0.0344328	-2.13931
PHGDH	-0.59468	6.11074	-4.68715	4.81343e-06	0.000349786	3.86507
CD8B1	-0.592719	6.07495	-3.04641	0.002594	0.0287614	-1.87638
RASD1	-0.589483	2.99236	-4.06482	6.65763e-05	0.00225226	1.4391
HOMER2	-0.587823	3.48145	-3.05154	0.00255181	0.0284869	-1.86182
USMG5	-0.587767	3.91866	-1.9792	0.0490199	0.179553	-4.4013
CRAT	-0.586222	4.57379	-2.98019	0.00319893	0.0324703	-2.06219
MATK	-0.582476	8.94978	-4.55444	8.62959e-06	0.000526497	3.32372
ARL3	-0.581351	4.56759	-4.77754	3.21102e-06	0.000264993	4.24107
TLE2	-0.580106	4.29772	-3.88869	0.000132893	0.00382872	0.805939
KEL	-0.579094	5.25862	-2.36578	0.0188459	0.0997274	-3.60398
LOC643505	-0.576379	4.36811	-2.68479	0.00780084	0.0568326	-2.84486
CLDN5	-0.575993	5.63171	-2.81631	0.0052919	0.0441986	-2.50576
F8A3	-0.574024	4.59946	-4.47619	1.2104e-05	0.000683637	3.01049
TNNC2	-0.571972	2.87928	-2.88623	0.00428059	0.0392864	-2.31934
LOC553158	-0.570746	5.56536	-3.11621	0.00207179	0.0247926	-1.67648
LOC113230	-0.570255	3.60403	-4.10846	5.58943e-05	0.00203292	1.59971
POLR2J2	-0.569358	4.79962	-3.56534	0.000444254	0.00875387	-0.292514
D4S234E	-0.566579	7.46283	-3.10529	0.00214655	0.0252996	-1.70805
CYP2S1	-0.55586	5.047	-3.58344	0.000416127	0.00834888	-0.23325
MICAL2	-0.552651	6.14427	-3.3398	0.000982139	0.0151422	-1.00848
C5orf4	-0.551905	8.65881	-2.86818	0.00452321	0.0403797	-2.36787
SLC6A9	-0.551078	4.06034	-2.36848	0.0187124	0.0992974	-3.59794
FBXO9	-0.541872	6.15324	-3.48926	0.000583179	0.0106456	-0.538694
GPR77	-0.539877	5.19537	-3.81808	0.000174161	0.00460106	0.558951
ATG9B	-0.537563	3.25701	-3.84321	0.000158248	0.00431926	0.646409
TGFB1I1	-0.536453	3.16236	-3.37624	0.000866344	0.0140856	-0.895645
ROPN1B	-0.536284	3.34086	-2.87504	0.00442952	0.0399172	-2.34945
C10orf58	-0.534507	4.41364	-3.66157	0.000312848	0.00694414	0.02562
SIRPB2	-0.533783	5.99374	-3.65225	0.000323766	0.00710355	-0.00553989
PFN2	-0.531919	3.43948	-3.15844	0.00180492	0.0225871	-1.55355
CLEC4C	-0.526614	4.88846	-2.03982	0.0425431	0.165431	-4.28527
C6orf21	-0.524598	5.0695	-2.55819	0.0111826	0.0717157	-3.15694
MAGOH	-0.524081	5.71385	-3.30063	0.0011226	0.0165821	-1.12854
FCER1A	-0.518894	9.73648	-2.37281	0.0185001	0.0985927	-3.58824
MPZL1	-0.518232	7.37899	-3.65731	0.000317792	0.00699941	0.0113763
DKK3	-0.517386	2.85138	-2.62152	0.0093544	0.0639451	-3.00258
FAM101B	-0.516947	8.40421	-4.46614	1.26375e-05	0.00069653	2.97059
CLIC3	-0.511693	8.15216	-3.77265	0.000206844	0.00514229	0.402116
THBD	-0.511389	3.37546	-3.14367	0.00189445	0.023341	-1.59673
CTDSPL	-0.511067	6.71034	-2.9857	0.00314401	0.0322469	-2.04686
HIST1H1C	-0.509324	8.94082	-4.13727	4.9759e-05	0.00191145	1.70656
VWF	-0.506341	5.88198	-2.22826	0.0268583	0.123708	-3.90317
SDK2	-0.506227	2.49064	-3.62633	0.000356023	0.00754387	-0.0917686
COLQ	-0.505893	6.27374	-3.87	0.000142808	0.00401304	0.740178
TMEM97	-0.505657	5.3713	-4.82984	2.53397e-06	0.00022586	4.46123
SORBS3	-0.504524	5.95691	-4.07675	6.34772e-05	0.00218795	1.48286
IMPA2	-0.504466	9.80342	-5.18994	4.71424e-07	6.48009e-05	6.02889
PCSK1N	-0.502578	4.68453	-2.00397	0.0462795	0.173742	-4.3543
KIT	-0.502332	5.31539	-2.93664	0.0036646	0.0356009	-2.18233
AXIN2	-0.501193	6.6003	-3.04362	0.00261722	0.028934	-1.88429
AIRE	0.502381	2.87205	3.35795	0.000922774	0.0146639	-0.952423
LOC139886	0.504854	5.169	2.76657	0.00613859	0.0485873	-2.63577
NUSAP1	0.505235	5.99637	4.9842	1.24572e-06	0.000138733	5.1223
RGL1	0.506533	5.61645	3.99637	8.73348e-05	0.00275249	1.19018
ZNF333	0.507189	5.43404	3.27864	0.00120941	0.0174829	-1.19537
IGF2BP3	0.507915	4.92384	2.77496	0.00598769	0.047973	-2.614
SAP30	0.513503	7.50233	4.06688	6.60292e-05	0.00224205	1.44668
ANKRD15	0.513604	4.38103	2.20974	0.0281365	0.126881	-3.94214
NANOS1	0.513932	3.31211	2.55893	0.0111595	0.0716884	-3.15516
PGAP1	0.515612	2.54923	4.17426	4.2822e-05	0.00174485	1.84464
MOV10	0.51563	7.06983	4.50387	1.07441e-05	0.000631853	3.12078
CACNA1A	0.517308	2.2228	3.59818	0.000394465	0.00809434	-0.184785
KIAA0101	0.518787	3.17318	2.41516	0.0165314	0.0918689	-3.4924
MTRF1	0.522321	4.53074	4.70683	4.4095e-06	0.000324568	3.94643
C8orf38	0.52439	4.57991	4.09287	5.95062e-05	0.00212158	1.54219
CDCA7	0.524665	6.19841	3.58791	0.00040944	0.00830682	-0.218566
ANXA4	0.525978	5.53846	3.60111	0.000390291	0.00804981	-0.175137
TCF7L2	0.527505	5.11917	3.35764	0.000923752	0.0146639	-0.953375
ASPM	0.528094	2.83841	3.24989	0.00133237	0.0186353	-1.28215
TDRD7	0.528161	9.14681	5.99409	8.1178e-09	5.3778e-06	9.83659
LOC652671	0.534955	3.70578	3.10304	0.00216226	0.0253798	-1.71454
PLEKHG1	0.536725	3.55507	3.31324	0.00107547	0.0161874	-1.09004
VSIG9	0.536919	5.0768	3.62888	0.000352717	0.00752208	-0.0833
PHC3	0.537623	4.35929	4.13833	4.95463e-05	0.00191145	1.7105
FLJ10120	0.54603	6.30997	2.76684	0.00613368	0.0485873	-2.63507
KNTC2	0.546661	4.85988	4.20429	3.7879e-05	0.00158883	1.95752
C10orf80	0.546673	4.78519	3.54073	0.000485371	0.00936989	-0.372667
MOBKL2B	0.548099	3.34351	3.36937	0.000887141	0.0142958	-0.916994
KLHL14	0.549881	3.42282	2.41332	0.0166133	0.0921442	-3.49662
FRMD3	0.551232	6.6693	4.00654	8.39017e-05	0.00267384	1.22694
HBEGF	0.551957	3.66149	3.63069	0.000350396	0.00751441	-0.0773069
SCO2	0.552775	9.73563	4.44557	1.38003e-05	0.000733074	2.88919
VRK2	0.552807	6.0644	4.44533	1.38146e-05	0.000733074	2.88823
RALGPS2	0.555176	5.04244	2.87746	0.00439689	0.0398443	-2.34294
FANCL	0.557151	4.80421	4.44995	1.35447e-05	0.000728922	2.90647
FLJ10260	0.558472	5.261	4.87781	2.03575e-06	0.00019683	4.66491
IL15	0.56017	6.3137	5.50635	1.00138e-07	2.19707e-05	7.47819
CD38	0.561147	5.56518	2.95189	0.00349489	0.0344328	-2.14044
CD274	0.563862	2.80128	3.25633	0.00130387	0.0184336	-1.26278
MAFB	0.566624	9.17665	6.25276	2.0204e-09	2.09552e-06	11.1453
ARP10	0.569152	5.18068	3.3726	0.000877305	0.0141773	-0.906961
SP100	0.569521	8.19266	5.38252	1.8505e-07	3.24805e-05	6.9032
PTPRO	0.572816	5.50103	4.43695	1.43177e-05	0.000756252	2.85516
CD22	0.573079	4.69816	2.86871	0.00451588	0.0403459	-2.36644
STARD8	0.573428	4.0536	3.8748	0.000140194	0.00396632	0.757059
FBXO6	0.577408	8.35042	4.59493	7.23139e-06	0.000471445	3.48752
MASTL	0.580831	4.12618	4.60815	6.82405e-06	0.000455296	3.54127
CCNA2	0.582998	3.90827	3.89505	0.000129669	0.00375479	0.828393
PDK4	0.583151	7.12074	2.88055	0.00435562	0.0395647	-2.33464
CCR1	0.584312	9.07237	4.60955	6.78216e-06	0.000455163	3.54697
CXorf21	0.585466	4.7928	3.46869	0.00062723	0.0113229	-0.604472
TTYH3	0.587464	7.93488	6.12584	4.01719e-09	3.05547e-06	10.4983
IL27	0.592223	2.38039	3.87433	0.00014045	0.00396632	0.75539
NEXN	0.592964	6.0575	4.72183	4.12381e-06	0.00030953	4.00863
STAT1	0.593792	12.5358	6.49902	5.18753e-10	1.10401e-06	12.4264
DC36	0.599698	5.2579	4.01581	8.08842e-05	0.00261419	1.26052
C3orf14	0.601225	5.79943	3.96517	9.8721e-05	0.00305233	1.07791
GBP4	0.604698	9.6827	5.06871	8.38653e-07	0.000101789	5.4912
LOC619383	0.607562	5.37058	4.46834	1.25184e-05	0.000694918	2.97935
FLJ11155	0.613493	4.97141	4.07957	6.2763e-05	0.00217724	1.49325
CTSL1	0.613508	7.43119	4.04388	7.23675e-05	0.00238625	1.36256
FLJ37562	0.616397	4.14766	3.95962	0.000100887	0.00309708	1.05803
SLC15A2	0.616505	3.43268	4.78062	3.16679e-06	0.000264476	4.25396
SP140	0.619493	6.78097	5.59491	6.41597e-08	1.62666e-05	7.89542
C1GALT1	0.623213	7.08456	5.32698	2.42945e-07	3.84967e-05	6.64852
PRIC285	0.62597	10.6346	4.95057	1.4562e-06	0.000155269	4.97685
PML	0.629125	7.10261	5.55708	7.76443e-08	1.82478e-05	7.71659
DCBLD1	0.630016	3.54782	4.00685	8.38012e-05	0.00267384	1.22804
LENG8	0.631482	4.89074	4.52202	9.93336e-06	0.000590259	3.19341
RGPD1	0.641557	5.88975	2.88083	0.00435185	0.039562	-2.33388
C2	0.641741	4.2856	4.0462	7.17028e-05	0.00237856	1.37103
MT1A	0.64628	10.3153	5.36893	1.97837e-07	3.25753e-05	6.84067
C6orf206	0.646298	2.70996	3.39219	0.00081978	0.0136728	-0.845905
IFI35	0.651069	9.90148	5.02059	1.05122e-06	0.000122573	5.28054
STAT2	0.651417	11.5136	6.36789	1.07454e-09	1.22594e-06	11.7401
FMNL2	0.655172	2.83131	4.19219	3.98005e-05	0.00165724	1.91198
PCGF5	0.65597	5.20611	4.28676	2.69536e-05	0.00128131	2.27103
SOCS1	0.659645	6.30329	4.77634	3.2285e-06	0.000264993	4.23603
CHMP5	0.668011	8.02085	4.75248	3.59451e-06	0.000280889	4.13624
CEACAM1	0.676634	9.29697	5.81745	2.05099e-08	8.35704e-06	8.96561
MT1E	0.679669	6.78338	3.95406	0.000103104	0.00313948	1.03813
TNFAIP6	0.681754	10.1415	4.52779	9.68849e-06	0.000584087	3.21652
IRF7	0.682271	10.402	4.24602	3.19068e-05	0.00141095	2.11554
PNPT1	0.686678	5.56005	5.19861	4.5223e-07	6.36974e-05	6.06772
IFNG	0.689451	3.65125	2.9636	0.00336946	0.0334862	-2.10813
LOC653573	0.689944	3.03667	4.85118	2.29931e-06	0.000213275	4.55163
CCNA1	0.691308	2.83649	3.67321	0.000299709	0.00669441	0.0646074
TYMS	0.697517	5.46149	4.1378	4.96539e-05	0.00191145	1.70851
MUC1	0.701102	4.1484	4.82283	2.61594e-06	0.000229579	4.43163
LOC197135	0.708067	7.16912	6.43308	7.49051e-10	1.10401e-06	12.0801
PARP9	0.711734	10.6277	6.43673	7.34032e-10	1.10401e-06	12.0992
NELL1	0.712481	4.35306	3.25366	0.00131561	0.0184849	-1.27081
XIST	0.722047	8.4694	2.27967	0.0235697	0.11438	-3.79332
MT2A	0.725278	10.6521	5.05613	8.89809e-07	0.000105748	5.43598
NFE2L3	0.727187	6.15267	5.90193	1.31967e-08	6.54612e-06	9.37985
LGALS3BP	0.732659	6.82152	3.71981	0.000252139	0.00584685	0.221786
INDO	0.737334	5.7338	3.07217	0.00238863	0.0272246	-1.80311
MERTK	0.742284	5.01366	4.35709	2.00839e-05	0.0010006	2.54248
PARP14	0.753903	9.62992	5.76706	2.6625e-08	1.01255e-05	8.72059
DDX58	0.768323	7.821	5.61541	5.78352e-08	1.49964e-05	7.99272
NTNG2	0.77506	5.61839	4.49258	1.12798e-05	0.000649957	3.07575
GTSCR1	0.781798	4.88078	3.33717	0.000991033	0.0152381	-1.01659
PLSCR1	0.783928	7.34736	4.1391	4.93927e-05	0.00191145	1.71336
LAP3	0.788501	9.23082	5.39892	1.70698e-07	3.09114e-05	6.97876
PARP12	0.791257	9.46287	5.91902	1.20643e-08	6.54612e-06	9.46415
HESX1	0.798143	2.10328	4.29721	2.58063e-05	0.0012319	2.31114
LGP2	0.808363	7.44402	4.91503	1.71589e-06	0.000177969	4.82403
GBP5	0.817209	10.3025	5.88664	1.42977e-08	6.79679e-06	9.30454
APOBEC3A	0.822151	8.66842	3.74323	0.000231018	0.005491	0.301426
GPD2	0.824448	4.04471	4.65423	5.57005e-06	0.000384131	3.72958
ENDOGL1	0.833072	6.67951	5.39573	1.73401e-07	3.09114e-05	6.96405
TIMM10	0.836756	8.57838	4.23686	3.31351e-05	0.00145961	2.08074
HERC6	0.845876	8.61927	5.10326	7.12384e-07	9.03066e-05	5.64345
FLJ39501	0.86529	4.40105	3.49826	0.000564859	0.010428	-0.509848
JUP	0.875058	7.40955	4.21085	3.68746e-05	0.00156395	1.98226
IFIH1	0.878069	8.94255	6.21153	2.52846e-09	2.21902e-06	10.9341
INCA	0.881897	3.87615	4.25798	3.03687e-05	0.00136947	2.16107
C9orf109	0.883675	3.5247	4.51014	1.0457e-05	0.000618155	3.14585
GBP1	0.903153	10.2425	6.1042	4.51242e-09	3.21764e-06	10.3889
IFIT2	0.9034	12.1002	5.44329	1.37075e-07	2.69636e-05	7.18412
EIF2AK2	0.916156	10.8331	5.97553	8.95593e-09	5.3778e-06	9.74421
TOP2A	0.94075	3.28909	4.81205	2.74716e-06	0.000235414	4.38611
MS4A4A	0.941624	5.74724	5.31524	2.57261e-07	3.91694e-05	6.59498
RNF36	0.952217	4.81702	6.91193	4.92736e-11	1.87388e-07	14.6478
RTP4	0.979128	7.17874	4.92675	1.62565e-06	0.000170157	4.87433
ZNF684	0.981728	4.83571	5.51044	9.81113e-08	2.19481e-05	7.49735
AGRN	0.988698	3.199	4.6569	5.50454e-06	0.000382935	3.74056
TTC21A	1.03155	4.91252	5.63228	5.30905e-08	1.49372e-05	8.073
ANKRD22	1.03407	6.70305	4.59708	7.16341e-06	0.000469698	3.49627
PDGFRB	1.03768	4.64592	4.81062	2.76496e-06	0.000235414	4.38011
USP18	1.04319	3.46957	4.27661	2.81137e-05	0.00130918	2.23218
ETV7	1.07253	3.66176	4.56578	8.2138e-06	0.000516902	3.36947
OAS1	1.08101	9.34881	4.32329	2.31444e-05	0.00112618	2.41157
OAS2	1.09137	7.82678	4.60392	6.95192e-06	0.000459661	3.52405
CCL8	1.1017	3.12189	4.76133	3.45429e-06	0.000273681	4.17321
SN	1.10774	2.83356	4.25297	3.10043e-05	0.00137637	2.14198
MX1	1.11476	12.4689	4.74389	3.73591e-06	0.000287993	4.10039
FLJ20035	1.12119	8.03637	5.86943	1.56443e-08	7.13941e-06	9.21998
OASL	1.12801	9.05424	4.90962	1.75919e-06	0.000179529	4.80082
IFI6	1.16156	10.2902	4.46926	1.24693e-05	0.000694918	2.98299
ZCCHC2	1.17517	3.62995	4.84651	2.34873e-06	0.000213786	4.53184
IFITM3	1.19087	12.5626	5.36992	1.96874e-07	3.25753e-05	6.84524
ATF3	1.19795	4.52903	5.45327	1.3045e-07	2.61107e-05	7.2305
CCL2	1.20417	3.30885	4.31298	2.41638e-05	0.00116323	2.3718
XAF1	1.21138	9.59398	5.70272	3.70668e-08	1.25588e-05	8.41004
GBP6	1.22683	4.07331	4.90158	1.82543e-06	0.000182687	4.76641
HES4	1.22869	8.17742	4.72918	3.99034e-06	0.000301495	4.03919
LOC400759	1.25321	7.06758	6.4059	8.709e-10	1.10401e-06	11.9381
IFIT3	1.28871	11.3695	5.53893	8.5058e-08	1.94085e-05	7.63112
BATF2	1.33124	6.19634	5.36685	1.99866e-07	3.25753e-05	6.83113
USP41	1.44945	2.99901	4.89158	1.91122e-06	0.000187547	4.72366
SERPING1	1.47173	7.2156	5.48409	1.11909e-07	2.36439e-05	7.37408
LY6E	1.4757	10.8741	5.62116	5.61726e-08	1.49964e-05	8.02007
DNAPTP6	1.48294	6.35737	5.26609	3.26665e-07	4.78796e-05	6.37166
IFIT1	1.48662	10.596	4.98304	1.25247e-06	0.000138733	5.11726
CXCL10	1.53484	5.70435	5.90259	1.31512e-08	6.54612e-06	9.38309
EPSTI1	1.53584	10.915	6.41664	8.20593e-10	1.10401e-06	11.9941
ISG15	1.59276	9.76077	5.41178	1.60201e-07	2.99628e-05	7.03816
LAMP3	1.69523	5.52219	5.49184	1.07664e-07	2.31763e-05	7.4103
IFI44	1.73448	10.2184	5.92268	1.18343e-08	6.54612e-06	9.48224
LOC129607	1.93118	4.96633	4.87152	2.09524e-06	0.000198188	4.6381
IFI44L	2.17726	10.2481	5.61813	5.70418e-08	1.49964e-05	8.00567
RSAD2	2.18358	9.46299	5.68447	4.06947e-08	1.29292e-05	8.32242
OTOF	2.71235	4.95052	4.87127	2.09761e-06	0.000198188	4.63705
IFI27	2.98722	9.38153	5.25795	3.3978e-07	4.90702e-05	6.33486
