# Supplementary material for: Identification and verification of inflammatory biomarkers for primary Sjögren’s syndrome
Source: Clin Rheumatol. 2024 Feb 20;43(4):1335–52. doi: 10.1007/s10067-024-06901-y (PMC10944815; doi:10.1007/s10067-024-06901-y)
Supplement: Supplementary file 8 — Supplementary file8 (XLSX 15 KB) [file 10067_2024_6901_MOESM8_ESM.xlsx]

## Sheet: Sheet1
Supplementary Table 4: The list of key module genes
key module genes
IFITM2
HLA-DRA
NPC2
IFITM1
PSME1
ECGF1
SAT
IFITM3
STAT1
FGL2
MX1
HLA-DRB4
GBP2
EEF2
ADAR
IFIT2
TAP1
SCOTIN
ISG20
FFAR2
ISGF3G
SP110
NAGK
LILRA5
TNFSF13B
STAT2
IFIT3
TMEM123
TNFSF10
CASP1
PHF11
CASP4
RAB8A
FLJ11000
PSMB8
IFI16
MX2
RAB24
LYSMD2
CAT
EPSTI1
WARS
PLAC8
LY6E
EIF2AK2
CNDP2
NT5C3
MT2A
PRIC285
PARP9
IFIT1
ELF1
PSME2
FAM46A
IRF7
MT1A
GBP5
IFI6
IFI44L
PSMB9
GBP1
IFI44
DRAP1
PPP6C
TNFAIP6
PABPC4
TNK2
ZNFX1
CYBB
DUSP3
ERGIC3
NSF
VAMP5
TBC1D14
UNC93B1
BTN3A1
IFI35
RHBDF2
AXUD1
C4orf34
LBA1
FGD2
TXNDC12
DYNLT1
IMPA2
NUB1
ISG15
DHRS9
CBX7
SCO2
BST2
GBP4
ABCA1
PARP14
RPS6KA5
XAF1
TRIM56
TRIM38
UBE2L6
RSAD2
PARP12
IFI27
RBCK1
NUDT5
SCARB2
OAS1
CABC1
CEACAM1
LOC57149
LAP3
GPBAR1
LGALS9
MAFB
TRIM21
LOC652694
TDRD7
PRKD2
GTF2IP1
TRAFD1
XRN1
POLB
CCR1
OASL
C10orf7
FCGR1B
PSTPIP2
SQRDL
IFIH1
PARP10
HOP
KYNU
LOC652878
CENTA2
ZFYVE26
NBN
CYSLTR1
DYM
PIK3AP1
NCOA7
FAM8A1
RAB22A
MS4A7
RNF103
ASCL2
MAD2L1BP
BLVRA
IL1RN
MGC20255
AIM2
HERC6
RIPK2
BTN3A3
TIMM10
IRS2
ST3GAL5
LGALS8
TRIM5
SLC27A3
FLJ10379
FAM101B
FN5
FBXO6
USF1
RNF31
GORASP1
C10orf9
PCK2
PHACTR2
OAT
SP100
HES4
MICB
FCGR1A
TRIM26
ANKFY1
C9orf156
NUDT16L1
EIF4G3
REC8L1
TOR1B
FLJ20035
GALM
CHMP5
ZC3HAV1
NOD27
GCH1
FLJ11286
ACOT9
TAF4
DUSP5
UNQ5783
SNTB1
CNOT6
COP1
EPB41L3
OAS2
SLC3A2
DDX58
MEF2C
LHFPL2
GADD45B
MRPL44
PRKAG2
GLS
UBE2S
CPEB3
LOC441168
RIPK3
TMCO3
TLR7
CUL1
CDKN1C
LGP2
CTSL1
IL1F7
JUP
MGC18216
TMEM62
MPZL1
PLSCR1
SIRT7
MR1
TCF4
LOC93622
FER1L3
ZNF200
SERPING1
BAK1
LGTN
RTP4
LOC197135
SESTD1
ORM1
SNAPC3
KCNMB1
PML
MLKL
BARD1
MOV10
LOC400759
MGC5242
MGC19764
ASPHD2
HIST1H4H
PTGDS
SLIC1
C14orf58
LGALS3BP
CD160
MT1E
SP140
ADRA1D
TBC1D8
RASGRP3
ANKRD22
ENDOGL1
FRMD3
AUTS2
ING2
LOC654346
PTP4A1
CBWD5
HIST1H3D
RBBP8
PPM1K
LOC255620
DNAPTP6
LOC651816
LILRB4
IL15
SOCS1
AGPAT3
GAST
TMEM51
GCNT1
CAPN2
LNPEP
RNF135
PARP11
SRGAP2
TRIP6
BATF2
CTRL
CASP5
LOC649864
SLC9A9
ZBED4
PRRG4
VRK2
NEXN
CDC14B
NUSAP1
LOC130074
LOC284194
ATP6V1E2
NDRG2
MGC24665
C3orf14
MAP7
TTYH2
LOC643995
MS4A4A
CXCL10
NTNG2
RGL1
ABCB1
C21orf63
GBP3
CD38
TKTL1
PNPT1
LOC648366
LAMP3
PTPRO
PKP4
ACP2
TYMS
SRD5A1
KCNH3
CD40
LOC653344
IPO4
LILRB1
KIAA0226
LOC654347
KIT
RPL10L
TCL1B
Septin 4
FLJ10260
MTHFD1L
GTPBP2
FEZ1
EFHC2
YIPF2
STOML1
UBE2C
C9orf7
MERTK
LOC129607
OTOF
MFSD7
C1orf73
IGF2BP3
TTC21A
PRKCE
KNTC2
CTSF
ZNF684
RNF36
LAMA3
FANCL
HINT3
TK1
SLC22A17
C14orf122
PDGFRB
C1orf115
ATF3
CDCA5
FLJ39501
C14orf21
CLDN23
THRA
MGC52282
MID2
NELL1
GCNT2
C6orf85
C2
APOL1
MUC1
MASTL
KISS1R
CCNB2
GBP6
STARD8
AURKB
PPP2R3B
FLJ12571
CCNA2
INCA
SNF1LK
ZNF219
FPRL2
PIWIL4
LOC652671
ETV7
KIAA0082
ZCCHC2
IL15RA
CLEC9A
DCBLD1
C9orf109
USP18
PFN2
THBD
CCL2
C14orf132
TOP2A
CYP2J2
CTGF
CEP55
LOC440836
AGRN
P2RY6
CCL8
HS3ST3B1
LOC653573
OIP5
USP41
C1QA
TEAD4
HCAP-G
DNAJB5
CDC45L
AIRE
ORM2
ASPM
CCNA1
SN
FMNL2
CD274
RAD51AP1
MDK
C6orf206
FGF9
DLG7
LRRC23
BUB1
LOC652113
C8orf31
PDE9A
HTRA1
HIST1H4D
PGAP1
C15orf48
IL4I1
SHH
MELK
MSR1
IL27
ONECUT2
TGM1
C1QC
EPHB2
LOC654110
MOXD1
GPR42
TTK
CACNA1A
VPREB1
RAB36
AXL
KPTN
HESX1
C22orf18
EXOC3L
CXorf22
