# Supplementary material for: Identification and verification of inflammatory biomarkers for primary Sjögren’s syndrome
Source: Clin Rheumatol. 2024 Feb 20;43(4):1335–52. doi: 10.1007/s10067-024-06901-y (PMC10944815; doi:10.1007/s10067-024-06901-y)
Supplement: Supplementary file 10 — Supplementary file10 (XLSX 24 KB) [file 10067_2024_6901_MOESM10_ESM.xlsx]

## Sheet: Sheet1
Supplementary Table 6 The result of single-gene GSEA
CXCL10
Description	setSize	enrichmentScore	NES	pvalue	p.adjust	qvalues	rank	leading_edge	core_enrichment	group
HALLMARK_INTERFERON_ALPHA_RESPONSE	74	0.90583	3.02472	1e-10	2.5e-09	1.57895e-09	423	tags=69%, list=5%, signal=66%	IFI27/IFI44L/RSAD2/CXCL10/IFI44/ISG15/LAMP3/OAS1/EPSTI1/LY6E/IFIT3/BATF2/MX1/USP18/OASL/RTP4/IFITM3/LGALS3BP/PLSCR1/IFIT2/IRF7/HERC6/LAP3/IFIH1/PARP12/EIF2AK2/IFI35/PARP14/PARP9/PNPT1/GBP4/TRIM5/STAT2/MOV10/BST2/UBE2L6/TDRD7/IL15/IFITM1/TAP1/PSME2/NCOA7/CASP1/IFI30/ISG20/TRAFD1/NUB1/SP110/PSMB9/NMI/ADAR	activate
HALLMARK_INTERFERON_GAMMA_RESPONSE	161	0.837978	3.12289	1e-10	2.5e-09	1.57895e-09	556	tags=51%, list=7%, signal=48%	IFI27/IFI44L/RSAD2/CXCL10/IFI44/IFIT1/ISG15/CCL2/EPSTI1/LY6E/SERPING1/IFIT3/OAS2/BATF2/MX1/USP18/OASL/XAF1/RTP4/IFITM3/GBP6/LGALS3BP/PLSCR1/CD38/IFIT2/IRF7/HERC6/LAP3/IFIH1/DDX58/PARP12/EIF2AK2/IFI35/PARP14/MT2A/SOCS1/PNPT1/CD274/FCGR1A/GBP4/TNFAIP6/STAT2/TOR1B/BST2/PML/GCH1/UBE2L6/SLAMF7/CXCL9/TDRD7/MTHFD2/TNFSF10/STAT1/IL15RA/IL15/CD40/MX2/VAMP5/TAP1/PSME2/JAK2/CASP1/CD86/P2RY14/IFI30/CD69/ISG2…	activate
HALLMARK_INFLAMMATORY_RESPONSE	128	0.613428	2.21564	3.20452e-08	5.34087e-07	3.37318e-07	1132	tags=34%, list=14%, signal=30%	CXCL10/LAMP3/CCL2/LY6E/RTP4/IRF7/EIF2AK2/TNFAIP6/BST2/GCH1/CXCL9/TNFSF10/IL15RA/IL15/CD40/MSR1/IFITM1/AXL/P2RY2/HBEGF/CYBB/CD69/ABCA1/NMI/FFAR2/SCARF1/OSM/LDLR/CHST2/HIF1A/IRF1/RIPK2/TLR2/SPHK1/ICOSLG/CD48/ADM/ATP2B1/GNA15/PTGIR/SELL/STAB1/IL6/CD14	activate
HALLMARK_E2F_TARGETS	132	0.583076	2.11553	1.45705e-06	1.82132e-05	1.15031e-05	1258	tags=40%, list=16%, signal=34%	TOP2A/CDC20/CCNB2/RAD51AP1/MELK/HMMR/MTHFD2/BIRC5/UBE2T/AURKB/TK1/CKS2/CENPM/CCNE1/CHEK1/PTTG1/PRDX4/CKS1B/KIF2C/PLK4/TIMELESS/CDKN3/CENPE/AURKA/EZH2/MAD2L1/BARD1/NBN/UBE2S/HMGB2/RFC3/TMPO/MCM4/DEK/PCNA/EIF2S1/NME1/DUT/EED/MCM2/POLE4/ATAD2/RAD51C/LMNB1/SYNCRIP/DCK/RFC2/TUBG1/BRCA1/MLH1/RANBP1/RNASEH2A/AK2	activate
HALLMARK_G2M_CHECKPOINT	137	0.549468	2.00617	8.3426e-06	8.3426e-05	5.26901e-05	678	tags=27%, list=8%, signal=25%	TOP2A/CDC20/CCNB2/MT2A/CCNA2/BUB1/PML/HMMR/BIRC5/AURKB/NUSAP1/CKS2/TTK/CHEK1/PTTG1/KIF23/CKS1B/ATF5/KIF2C/PLK4/SQLE/CUL1/CDKN3/POLQ/CENPE/UBE2C/AURKA/EZH2/MAD2L1/PRC1/BARD1/STIL/UBE2S/SAP30/TMPO/HIF1A/TPX2	activate
HALLMARK_TNFA_SIGNALING_VIA_NFKB	136	0.518863	1.89333	3.03031e-05	0.000252526	0.00015949	1138	tags=32%, list=14%, signal=28%	CXCL10/CCL2/ATF3/IFIT2/IFIH1/DDX58/TNFAIP6/GCH1/DUSP5/IL15RA/TAP1/KYNU/SLC2A6/HBEGF/CD69/ABCA1/GADD45B/PANX1/TUBB2A/KLF4/TNF/LDLR/SPSB1/IRF1/MAFF/RIPK2/BTG3/TLR2/SPHK1/TNFAIP3/ICOSLG/CD83/ID2/TANK/VEGFA/ATP2B1/REL/EGR1/BIRC2/SLC16A6/IL6/IER5/PLEK	activate
HALLMARK_ALLOGRAFT_REJECTION	140	0.510547	1.86529	4.12048e-05	0.00029432	0.000185886	1202	tags=34%, list=15%, signal=29%	CCL2/IRF7/SOCS1/CCR1/IFNG/CXCL9/STAT1/IL15/CD40/C2/TAP1/HDAC9/JAK2/GCNT1/CD86/FASLG/FAS/HLA-DRA/TAP2/GBP2/FCGR2B/GPR65/IRF4/GZMB/CAPG/BCAT1/GZMA/TNF/HLA-DOB/HIF1A/HLA-G/HLA-DMA/RIPK2/TLR2/NME1/ICOSLG/CCR2/MRPL3/CD79A/IL12A/HLA-DMB/UBE2N/KLRD1/STAB1/IL6/LY86/BRCA1	activate
HALLMARK_COMPLEMENT	134	0.488665	1.78234	0.000491598	0.00307249	0.00194052	1145	tags=31%, list=14%, signal=27%	SERPING1/PLSCR1/IRF7/LAP3/C1QC/C1QA/LTF/DUSP5/CASP5/APOBEC3F/C2/GNB4/GPD2/KYNU/CR2/JAK2/CASP1/APOBEC3G/GNGT2/PSMB9/CASP3/PLA2G7/GZMB/CD36/CASP7/GZMA/IRF1/MAFF/VCPIP1/CTSO/TNFAIP3/SRC/F8/DUSP6/LGALS3/CTSH/ANXA5/FCN1/IL6/PLEK/CASP4	activate
HALLMARK_ANGIOGENESIS	20	-0.68281	-1.92811	0.000557719	0.00309844	0.00195691	433	tags=35%, list=5%, signal=33%	TNFRSF21/FSTL1/CXCL6/APP/THBD/PGLYRP1/SPP1	suppressed
HALLMARK_EPITHELIAL_MESENCHYMAL_TRANSITION	99	-0.42276	-1.65409	0.000715154	0.00357577	0.00225838	1013	tags=28%, list=12%, signal=25%	ITGA5/TNFRSF12A/NT5E/ITGB3/COL7A1/TGFB1/FBN2/IGFBP3/MGP/SERPINE2/FSTL1/GAS1/CD59/BASP1/CXCL6/CALD1/ENO2/MAGEE1/CDH2/SERPINH1/ANPEP/HTRA1/TPM2/PMP22/FBLN5/SPP1/COL6A2/PFN2	suppressed
HALLMARK_IL6_JAK_STAT3_SIGNALING	62	0.565758	1.84166	0.00102784	0.00467201	0.00295074	1132	tags=35%, list=14%, signal=31%	CXCL10/CD38/SOCS1/CCR1/STAT2/CXCL9/STAT1/IL15RA/ITGA4/FAS/LEPR/BAK1/CD36/TNF/IRF1/MYD88/TLR2/PTPN2/STAM2/HMOX1/IL6/CD14	activate
HALLMARK_APICAL_SURFACE	24	-0.607637	-1.80621	0.00275053	0.0114605	0.00723824	1681	tags=54%, list=21%, signal=43%	PKHD1/NCOA6/GHRL/FLOT2/MAL/SULF2/CROCC/CD160/DCBLD2/GAS1/APP/GATA3/EPHB4	suppressed
HALLMARK_MYOGENESIS	103	-0.398928	-1.55839	0.00432786	0.0166456	0.010513	1150	tags=35%, list=14%, signal=30%	SMTN/PDLIM7/COL6A3/MYOM1/FLII/FXYD1/SH2B1/TGFB1/PPFIA4/LSP1/ADCY9/PKIA/IGFBP3/PVALB/SVIL/GAA/ABLIM1/MYH9/CACNA1H/TSC2/MEF2D/MYBPH/SPTAN1/GSN/FHL1/VIPR1/GPX3/APP/TEAD4/PC/SORBS3/MAPRE3/CNN3/TPM2/MYOM2/COL6A2	suppressed
HALLMARK_APOPTOSIS	127	0.43536	1.56949	0.00519158	0.0185414	0.0117103	681	tags=20%, list=8%, signal=19%	ATF3/IFITM3/CD38/TOP2A/PDGFRB/CCNA1/PMAIP1/GCH1/TNFSF10/TAP1/CASP1/CD69/ISG20/GADD45B/FASLG/FAS/CAV1/CASP3/CASP7/TNF/HMGB2/PEA15/DDIT3/IRF1/DNAJA1/PSEN2	activate
HALLMARK_KRAS_SIGNALING_DN	66	0.507588	1.65226	0.0098643	0.032881	0.0207669	682	tags=18%, list=8%, signal=17%	IFI44L/RSAD2/MX1/CCNA1/IFNG/TCL1A/PDCD1/KCNMB1/VPREB1/BARD1/CHST2/TGM1	activate
HALLMARK_UNFOLDED_PROTEIN_RESPONSE	89	0.450805	1.54823	0.0121336	0.0379176	0.0239479	1052	tags=17%, list=13%, signal=15%	IFIT1/CCL2/ATF3/MTHFD2/CKS1B/SLC1A4/TUBB2A/GOSR2/SPCS3/EIF2S1/VEGFA/LSM1/CEBPG/YIF1A/SERP1	activate
EIF2AK2
Description	setSize	enrichmentScore	NES	pvalue	p.adjust	qvalues	rank	leading_edge	core_enrichment	group
HALLMARK_HEME_METABOLISM	138	-0.6586	-2.57029	1e-10	1.66667e-09	1.19298e-09	902	tags=41%, list=11%, signal=37%	RNF123/CTSE/EPOR/ADIPOR1/PPP2R5B/OPTN/GCLC/PC/MAP2K3/RANBP10/RAD23A/MKRN1/SEC14L1/HAGH/HDGF/E2F2/XPO7/ISCA1/HMBS/BLVRB/EIF2AK1/BPGM/BNIP3L/NARF/ICAM4/FBXO7/EPB41/GATA1/MPP1/GYPB/XK/HBD/GLRX5/CAT/TMCC2/SNCA/RBM38/PRDX2/FBXO9/KEL/BSG/TRIM58/ARHGEF12/KLF1/TSPAN5/TRIM10/PDZK1IP1/SLC6A9/SELENBP1/FECH/EPB42/TNS1/OSBP2/SPTB/MXI1/CA1	suppressed
HALLMARK_INTERFERON_ALPHA_RESPONSE	74	0.917571	2.79198	1e-10	1.66667e-09	1.19298e-09	486	tags=77%, list=6%, signal=73%	IFI27/IFI44L/RSAD2/IFI44/ISG15/LAMP3/LY6E/OAS1/IFIT3/MX1/EPSTI1/USP18/OASL/RTP4/IFITM3/BATF2/LGALS3BP/IFIT2/HERC6/CXCL10/PLSCR1/EIF2AK2/IRF7/PARP12/IFIH1/IFI35/LAP3/PARP14/PNPT1/PARP9/TRIM5/MOV10/STAT2/BST2/TDRD7/IFITM1/GBP4/UBE2L6/TAP1/SP110/ADAR/ISG20/NUB1/TRAFD1/NCOA7/PSME2/PSMB9/IL15/RNF31/SELL/TRIM21/CASP1/IFI30/NMI/IFITM2/GBP2/ELF1	activate
HALLMARK_INTERFERON_GAMMA_RESPONSE	161	0.866191	2.94263	1e-10	1.66667e-09	1.19298e-09	605	tags=54%, list=7%, signal=51%	IFI27/IFI44L/RSAD2/IFI44/ISG15/IFIT1/LY6E/CCL2/OAS2/IFIT3/MX1/EPSTI1/USP18/OASL/SERPING1/XAF1/RTP4/IFITM3/BATF2/LGALS3BP/IFIT2/HERC6/CXCL10/PLSCR1/EIF2AK2/IRF7/PARP12/CD38/IFIH1/DDX58/IFI35/LAP3/GBP6/PARP14/PNPT1/MT2A/MX2/TOR1B/PML/STAT2/SOCS1/BST2/TDRD7/TNFAIP6/GBP4/UBE2L6/STAT1/TNFSF10/CD274/TAP1/SP110/ADAR/ISG20/GCH1/RBCK1/CD40/TRAFD1/IRF4/ZNFX1/PSME2/PSMB9/IL15/RNF31/LYSMD2/IL15RA/TRIM21/MYD8…	activate
HALLMARK_INFLAMMATORY_RESPONSE	128	0.681776	2.2633	7.19393e-09	8.99241e-08	6.43667e-08	652	tags=31%, list=8%, signal=29%	LAMP3/LY6E/CCL2/RTP4/CXCL10/EIF2AK2/IRF7/BST2/AXL/TNFAIP6/IFITM1/ABCA1/TNFSF10/FFAR2/MSR1/GCH1/CD40/HBEGF/OSM/ADM/IL15/ICOSLG/SELL/IL15RA/PTGIR/TNFRSF1B/MEFV/NMI/CHST2/SCARF1/HIF1A/TIMP1/P2RY2/IRF1/TLR2/CD14/LDLR/LTA/CYBB/ATP2B1	activate
HALLMARK_G2M_CHECKPOINT	137	0.54105	1.80627	0.000668095	0.00668095	0.00478215	1523	tags=39%, list=19%, signal=32%	MT2A/CDC20/PML/CCNB2/TOP2A/CCNA2/BUB1/AURKB/BIRC5/UBE2C/EZH2/NUSAP1/CHEK1/CUL1/HMMR/MCM2/ATF5/BARD1/KIF2C/STIL/UBE2S/KIF23/CENPA/TTK/SQLE/MARCKS/HIF1A/POLQ/TROAP/PTTG1/TPX2/SFPQ/KPNB1/NOLC1/PRC1/RACGAP1/AURKA/TMPO/CHAF1A/SYNCRIP/G3BP1/TOP1/LMNB1/CKS2/FBXO5/XPO1/MCM6/PLK1/ABL1/MYC/MAPK14/NASP/MTF2	activate
HALLMARK_ALLOGRAFT_REJECTION	140	0.530506	1.775	0.00131254	0.00975312	0.00698118	1264	tags=34%, list=16%, signal=29%	CCL2/IRF7/CCR1/SOCS1/STAT1/TAP1/C2/HLA-DOB/CD79A/CD40/IRF4/TAP2/FCGR2B/IL15/ICOSLG/BRCA1/CD86/CAPG/GCNT1/GBP2/HIF1A/TIMP1/JAK2/TLR2/HLA-DRA/HLA-E/GZMB/ELF4/HLA-DMA/HLA-G/CD74/NLRP3/FASLG/IL12RB1/EIF4G3/LTB/TNF/HLA-DOA/CCND3/FAS/CD8B/HDAC9/TLR1/LYN/CXCR3/STAB1/LCP2/IRF8	activate
HALLMARK_TNFA_SIGNALING_VIA_NFKB	136	0.538407	1.79961	0.00136544	0.00975312	0.00698118	1062	tags=29%, list=13%, signal=25%	CCL2/IFIT2/CXCL10/ATF3/IFIH1/DDX58/TNFAIP6/ABCA1/TAP1/DUSP5/GCH1/HBEGF/GADD45B/JUN/ICOSLG/IL15RA/IER2/REL/CD83/SPSB1/SLC2A6/EGR1/MARCKS/IRF1/KLF4/TLR2/LDLR/ATP2B1/NINJ1/MAFF/NFIL3/VEGFA/SNN/TSC22D1/TNF/KYNU/SPHK1/IER5/TNFAIP3	activate
HALLMARK_ADIPOGENESIS	134	-0.393753	-1.52348	0.00254502	0.0146602	0.0104936	2162	tags=38%, list=27%, signal=28%	DNAJB9/LIPE/COL4A1/SLC19A1/REEP5/UBQLN1/ACAA2/G3BP2/PRDX3/ALDH2/PFKFB3/EPHX2/POR/TALDO1/SOD1/MYLK/BCL6/CS/PHLDB1/SLC25A1/COQ3/GPX4/SDHC/PPM1B/DDT/COX6A1/PHYH/REEP6/CRAT/DHRS7/RETN/GADD45A/GHITM/RIOK3/TKT/RTN3/CD151/SLC27A1/ACOX1/LTC4S/FAH/TST/COX7B/GPX3/GBE1/CDKN2C/SLC1A5/CAT/RNF11/ANGPT1/ORM1	suppressed
HALLMARK_KRAS_SIGNALING_DN	66	0.598516	1.77915	0.00263883	0.0146602	0.0104936	464	tags=15%, list=6%, signal=14%	IFI44L/RSAD2/MX1/TCL1A/CCNA1/VPREB1/PDCD1/TGM1/BARD1/MEFV	activate
HALLMARK_COMPLEMENT	134	0.486243	1.62283	0.00595279	0.0297639	0.0213047	689	tags=17%, list=8%, signal=16%	SERPING1/PLSCR1/IRF7/LAP3/CR2/C1QA/C1QC/DUSP5/C2/GNB4/GPD2/CASP5/PSMB9/APOBEC3F/APOBEC3G/CASP1/CASP7/TIMP1/IRF1/JAK2/GNGT2/DUSP6/GZMB	activate
HALLMARK_E2F_TARGETS	132	0.482853	1.6081	0.0073471	0.0310666	0.0222371	1516	tags=40%, list=19%, signal=33%	CDC20/CCNB2/TOP2A/AURKB/MELK/TK1/TIMELESS/BIRC5/EZH2/CHEK1/CCNE1/RAD51AP1/HMMR/CENPM/MCM2/BRCA1/BARD1/KIF2C/RFC3/MCM4/UBE2S/UBE2T/MTHFD2/NBN/SHMT1/PTTG1/CDCA8/NOLC1/POLD1/DNMT1/RACGAP1/NUP205/AURKA/TMPO/PCNA/SYNCRIP/PRDX4/RFC2/TBRG4/RNASEH2A/EED/LMNB1/CKS2/XPO1/MCM7/HELLS/MCM6/PLK1/MYC/PAICS/TUBG1/ATAD2/NASP	activate
HALLMARK_IL6_JAK_STAT3_SIGNALING	62	0.585892	1.71837	0.00745597	0.0310666	0.0222371	624	tags=24%, list=8%, signal=23%	CXCL10/CD38/CCR1/STAT2/SOCS1/STAT1/JUN/IL15RA/MYD88/BAK1/TNFRSF1B/ITGA4/IRF1/TLR2/CD14	activate
HALLMARK_ANGIOGENESIS	20	-0.618233	-1.66855	0.0118421	0.0455466	0.0326018	527	tags=35%, list=6%, signal=33%	NRP1/APP/SPP1/CXCL6/THBD/FSTL1/PGLYRP1	suppressed
HALLMARK_EPITHELIAL_MESENCHYMAL_TRANSITION	99	-0.402196	-1.49677	0.0138362	0.0475797	0.0340571	1191	tags=31%, list=15%, signal=27%	MAGEE1/MGP/ITGB5/PVR/GADD45A/ITGAV/TPM2/ENO2/COL6A3/ANPEP/TPM1/GLIPR1/CD59/IGFBP3/FBN2/GAS1/THBS1/IGFBP2/SERPINH1/FBLN5/ITGB3/MYL9/SPP1/CXCL6/CDH2/FSTL1/HTRA1/COL6A2/CALD1/PMP22/PFN2	suppressed
HALLMARK_IL2_STAT5_SIGNALING	141	0.454415	1.52444	0.0142739	0.0475797	0.0340571	1264	tags=31%, list=16%, signal=27%	IFITM3/CXCL10/PLSCR1/GALM/SOCS1/GBP4/CDKN1C/TNFSF10/TLR7/MUC1/GADD45B/CD79B/IRF4/ANXA4/SELL/CCNE1/CD83/RABGAP1L/TNFRSF1B/CD86/CAPG/CTSZ/TNFRSF18/CISH/POU2F1/SWAP70/SOCS2/NDRG1/CAPN3/MAFF/NFIL3/CD81/LTB/PUS1/TNFRSF4/ICOS/PHTF2/CCND3/KLF6/TNFRSF21/DCPS/NCOA3/PRAF2/IRF8	activate
IL15
Description	setSize	enrichmentScore	NES	pvalue	p.adjust	qvalues	rank	leading_edge	core_enrichment	group
HALLMARK_INTERFERON_ALPHA_RESPONSE	74	0.840946	3.0135	1e-10	2.5e-09	1.68421e-09	558	tags=59%, list=7%, signal=56%	IFI27/IFI44L/RSAD2/CXCL10/IFI44/LAMP3/EPSTI1/ISG15/OAS1/IFIT3/LY6E/MX1/RTP4/BATF2/IL15/IFITM3/IFIT2/PLSCR1/OASL/USP18/LAP3/IFIH1/IRF7/LGALS3BP/EIF2AK2/PNPT1/PARP9/PARP12/HERC6/PARP14/IFI35/GBP4/TDRD7/STAT2/TRIM5/NCOA7/BST2/MOV10/UBE2L6/TAP1/CASP1/NMI/PSME2/IFITM1	activate
HALLMARK_INTERFERON_GAMMA_RESPONSE	161	0.773847	3.10272	1e-10	2.5e-09	1.68421e-09	587	tags=43%, list=7%, signal=41%	IFI27/IFI44L/RSAD2/CXCL10/IFI44/IFIT1/EPSTI1/ISG15/GBP6/IFIT3/CCL2/SERPING1/LY6E/MX1/XAF1/RTP4/BATF2/IL15/OAS2/IFITM3/IFIT2/PLSCR1/CD274/OASL/USP18/LAP3/IFIH1/IRF7/CD38/LGALS3BP/EIF2AK2/FCGR1A/PNPT1/MTHFD2/PARP12/GCH1/P2RY14/HERC6/DDX58/PARP14/CXCL9/IFI35/JAK2/TNFAIP6/CD69/GBP4/TDRD7/STAT2/TOR1B/STAT1/IL15RA/TNFSF10/MT2A/BST2/PML/CD40/LYSMD2/SOCS1/UBE2L6/FAS/TAP1/CASP7/CASP1/VAMP5/NMI/PTGS2/MX2/P…	activate
HALLMARK_INFLAMMATORY_RESPONSE	128	0.556395	2.17412	1.0575e-08	1.76251e-07	1.18737e-07	843	tags=26%, list=10%, signal=23%	CXCL10/LAMP3/CCL2/LY6E/RTP4/IL15/IRF7/EIF2AK2/GCH1/CXCL9/TNFAIP6/CD69/IL15RA/TNFSF10/MSR1/BST2/SCARF1/CD40/TLR2/STAB1/CYBB/AXL/NMI/IFITM1/ABCA1/CD48/LDLR/AHR/FFAR2/ATP2B1/OSM/ADM/HIF1A	activate
HALLMARK_E2F_TARGETS	132	0.518694	2.0351	3.18186e-07	3.97732e-06	2.67946e-06	1474	tags=39%, list=18%, signal=32%	TOP2A/RAD51AP1/MELK/CDC20/CCNB2/MTHFD2/HMMR/TMPO/UBE2T/CKS2/MAD2L1/PLK4/ATAD2/BIRC5/CHEK1/CENPE/DCK/NBN/DEK/RFC3/USP1/CENPM/PRDX4/BRMS1L/ASF1A/EZH2/NUDT21/PTTG1/EIF2S1/AURKB/CDKN3/TIMELESS/MCM4/BARD1/KIF2C/CCNE1/CKS1B/RAD51C/XPO1/EED/PHF5A/AURKA/SYNCRIP/TK1/HMGB2/LMNB1/DONSON/EXOSC8/BRCA1/POLE4/UBE2S	activate
HALLMARK_G2M_CHECKPOINT	137	0.497424	1.95484	2.2946e-06	2.2946e-05	1.54584e-05	1275	tags=35%, list=16%, signal=30%	TOP2A/CCNA2/CDC20/CCNB2/HMMR/BUB1/TMPO/DR1/CKS2/MAD2L1/MT2A/PLK4/PML/SQLE/BIRC5/STIL/CHEK1/POLQ/CENPE/CUL5/FBXO5/NUSAP1/TTK/KIF23/EZH2/PTTG1/UBE2C/KIF5B/AURKB/CDKN3/SAP30/HIF1A/PRC1/TPX2/BARD1/KIF2C/ARID4A/CENPA/MARCKS/PRPF4B/CKS1B/XPO1/AURKA/SLC12A2/SYNCRIP/CUL1/LMNB1/ATF5	activate
HALLMARK_ALLOGRAFT_REJECTION	140	0.486509	1.9247	3.34521e-06	2.78768e-05	1.87801e-05	1439	tags=35%, list=18%, signal=29%	CCL2/IL15/IFNG/IRF7/HDAC9/BCAT1/CXCL9/JAK2/CCR1/STAT1/RPL9/CD40/CCR2/SOCS1/GCNT1/C2/TLR2/GPR65/FAS/TAP1/STAB1/SOCS5/FASLG/TAP2/CD86/RPS3A/GBP2/HLA-DRA/GLMN/UBE2N/HIF1A/PTPRC/TNF/ST8SIA4/GALNT1/TRAT1/MRPL3/DEGS1/IRF8/BCL10/IL6/NCK1/RIPK2/IL12A/FCGR2B/KLRD1/HLA-DMB/BRCA1/CD47	activate
HALLMARK_TNFA_SIGNALING_VIA_NFKB	136	0.48648	1.91105	7.82533e-06	5.58952e-05	3.76557e-05	1556	tags=34%, list=19%, signal=28%	CXCL10/CCL2/ATF3/IFIT2/IFIH1/GCH1/DDX58/TNFAIP6/CD69/IL15RA/DUSP5/KYNU/SLC16A6/SLC2A6/KLF4/TLR2/TAP1/BIRC2/PANX1/MAP3K8/BTG3/PTGS2/ABCA1/LDLR/TANK/ATP2B1/VEGFA/PNRC1/TNF/IER5/MARCKS/IRF1/TNFAIP8/GADD45B/CCNL1/IL6/PDLIM5/MAFF/RIPK2/PHLDA1/TNFAIP3/KLF10/F2RL1/PTGER4/CD83/ID2	activate
HALLMARK_MYOGENESIS	103	-0.433813	-1.85099	5.79091e-05	0.000361932	0.000243828	1098	tags=35%, list=14%, signal=31%	GAA/ENO3/PC/CFD/FLII/TNNC2/SIRT2/MYH9/COL6A3/PTP4A3/SLC6A8/PDLIM7/ABLIM1/MEF2D/CNN3/MYO1C/VIPR1/MYLK/TPM2/SPTAN1/TEAD4/MAPRE3/IGFBP3/SORBS3/TSC2/FXYD1/CRAT/ITGB5/KCNH2/GSN/FHL1/GPX3/MYBPH/PVALB/COL6A2/MYOM2	suppressed
HALLMARK_COAGULATION	68	-0.471291	-1.86827	0.000240078	0.00133377	0.000898537	1121	tags=37%, list=14%, signal=32%	PECAM1/LGMN/S100A13/CFD/THBS1/SIRT2/RABIF/USP11/DPP4/GNB2/DUSP14/F12/GP1BA/CD9/PROS1/FURIN/MMP9/CFH/GSN/GP9/CRIP2/CAPN5/THBD/ITGB3/VWF	suppressed
HALLMARK_EPITHELIAL_MESENCHYMAL_TRANSITION	99	-0.391231	-1.66159	0.000393626	0.00196813	0.0013259	1235	tags=30%, list=15%, signal=26%	FOXC2/TNC/BASP1/CD59/THBS1/TNFRSF12A/TPM1/NT5E/COL6A3/SLC6A8/ITGA5/LRRC15/FLNA/MYLK/TPM2/SERPINH1/ENO2/PMP22/FBLN5/IGFBP3/ANPEP/CALD1/CDH2/ITGB5/PFN2/MYL9/FSTL1/COL6A2/SPP1/ITGB3	suppressed
HALLMARK_HEME_METABOLISM	138	-0.360238	-1.59522	0.000484721	0.00220328	0.00148431	2214	tags=42%, list=27%, signal=31%	SNCA/LPIN2/GAPVD1/PPP2R5B/ATP6V0A1/CDR2/ABCB6/MKRN1/HAGH/CTSE/ADD1/GYPB/ICAM4/PSMD9/EIF2AK1/FECH/SLC25A37/GLRX5/ADIPOR1/ALDH6A1/PGLS/RNF123/RANBP10/CA1/LRP10/SMOX/NARF/PC/FOXJ2/HDGF/E2F2/TSPAN5/PRDX2/MPP1/TMCC2/RAD23A/FBXO7/SLC6A8/EPB41/EPOR/MXI1/SLC6A9/BSG/MAP2K3/GATA1/TRIM58/TAL1/RBM38/EPB42/SELENBP1/SEC14L1/SPTB/KEL/OSBP2/TNS1/KLF1/MFHAS1/PDZK1IP1	suppressed
HALLMARK_APICAL_JUNCTION	108	-0.385154	-1.64123	0.000556473	0.00231864	0.00156203	993	tags=26%, list=12%, signal=23%	FSCN1/CRB3/MSN/PLCG1/TAOK2/ACTN1/ALOX15B/MYH9/GAMT/CNN2/ACTN4/CLDN9/BAIAP2/PKD1/PIK3R3/JAM3/MMP9/SORBS3/ADAM23/LDLRAP1/CRAT/KCNH2/MYL9/RHOF/MPZL1/DSC1/CLDN5/VWF	suppressed
HALLMARK_IL6_JAK_STAT3_SIGNALING	62	0.528081	1.83352	0.000669348	0.00257441	0.00173434	538	tags=26%, list=7%, signal=24%	CXCL10/CD38/LEPR/ITGA4/CXCL9/CCR1/STAT2/STAT1/IL15RA/PDGFC/SOCS1/CD36/TLR2/FAS/MAP3K8/STAM2	activate
HALLMARK_COMPLEMENT	134	0.408135	1.60767	0.00191998	0.00685706	0.00461949	1446	tags=33%, list=18%, signal=27%	SERPING1/PLSCR1/LAP3/IRF7/LTF/C1QC/JAK2/CASP5/VCPIP1/DUSP5/GPD2/PLA2G7/KYNU/USP15/C1QA/CD36/C2/CASP7/CASP1/CR2/APOBEC3F/GMFB/CASP3/DUSP6/CD46/GNB4/CTSO/APOBEC3G/IRF1/GNAI3/GNGT2/ANXA5/USP16/ANG/PSMB9/IL6/PPP2CB/MAFF/USP8/GCA/RASGRP1/AKAP10/TNFAIP3/LAMP2	activate
HALLMARK_IL2_STAT5_SIGNALING	141	0.36549	1.44582	0.0126265	0.039683	0.0267338	652	tags=16%, list=8%, signal=15%	CXCL10/IFITM3/PLSCR1/ITGAV/TLR7/ANXA4/PHTF2/GBP4/TWSG1/CDKN1C/TNFSF10/BMPR2/GALM/SOCS1/GPR65/MAP3K8/NFKBIZ/SMPDL3A/CD86/CD48/ICOS/CASP3/AHR	activate
HALLMARK_APOPTOSIS	127	0.374607	1.46245	0.0126986	0.039683	0.0267338	1252	tags=26%, list=15%, signal=22%	ATF3/IFITM3/PMAIP1/TOP2A/CD38/GCH1/CD69/ROCK1/CCNA1/PDGFRB/TNFSF10/FAS/TAP1/CASP7/CASP1/FASLG/BTG3/BCL2L2/CASP3/BNIP3L/DPYD/DDIT3/TNF/PEA15/IRF1/GADD45B/ISG20/CAV1/HMOX1/PSEN2/BCL10/IL6/HMGB2	activate
LY6E
Description	setSize	enrichmentScore	NES	pvalue	p.adjust	qvalues	rank	leading_edge	core_enrichment	group
HALLMARK_INTERFERON_ALPHA_RESPONSE	74	0.91742	2.77241	1e-10	2.5e-09	1.63158e-09	358	tags=69%, list=4%, signal=66%	IFI27/IFI44L/RSAD2/IFI44/ISG15/LAMP3/LY6E/OAS1/EPSTI1/USP18/MX1/IFIT3/OASL/RTP4/LGALS3BP/BATF2/IFITM3/CXCL10/HERC6/IFIT2/PLSCR1/IRF7/EIF2AK2/PARP12/IFIH1/IFI35/PARP14/LAP3/PNPT1/PARP9/MOV10/TRIM5/STAT2/BST2/TDRD7/IFITM1/GBP4/UBE2L6/TAP1/SP110/ISG20/ADAR/NUB1/NCOA7/TRAFD1/PSME2/IL15/PSMB9/SELL/IFI30/RNF31	activate
HALLMARK_INTERFERON_GAMMA_RESPONSE	161	0.86506	2.9307	1e-10	2.5e-09	1.63158e-09	477	tags=49%, list=6%, signal=47%	IFI27/IFI44L/RSAD2/IFI44/ISG15/IFIT1/LY6E/OAS2/CCL2/EPSTI1/USP18/MX1/IFIT3/OASL/SERPING1/XAF1/RTP4/LGALS3BP/BATF2/IFITM3/CXCL10/HERC6/IFIT2/PLSCR1/IRF7/EIF2AK2/CD38/PARP12/IFIH1/DDX58/IFI35/GBP6/PARP14/MT2A/LAP3/PNPT1/MX2/TOR1B/PML/SOCS1/STAT2/BST2/TDRD7/GBP4/UBE2L6/TNFAIP6/STAT1/CD274/TNFSF10/TAP1/SP110/ISG20/ADAR/GCH1/IRF4/CD40/RBCK1/IL15RA/TRAFD1/PSME2/IL15/ZNFX1/NOD1/PSMB9/LYSMD2/IFI30/RNF31/…	activate
HALLMARK_HEME_METABOLISM	138	-0.532872	-2.14549	1.19599e-08	1.99332e-07	1.30091e-07	1448	tags=39%, list=18%, signal=33%	XPO7/PPP2R5B/RHD/OPTN/BLVRB/NCOA4/SLC25A37/GCLC/HDGF/DCUN1D1/SDCBP/MAP2K3/RAD23A/FBXO7/GYPB/MFHAS1/EPOR/ISCA1/MKRN1/EIF2AK1/ICAM4/HBD/SEC14L1/GATA1/PC/KEL/BNIP3L/MPP1/TMCC2/XK/EPB41/PRDX2/NARF/KLF1/SNCA/GLRX5/FBXO9/RBM38/TRIM58/TRIM10/ARHGEF12/TSPAN5/PDZK1IP1/SLC6A9/SELENBP1/CAT/BSG/EPB42/FECH/OSBP2/SPTB/TNS1/CA1/MXI1	suppressed
HALLMARK_INFLAMMATORY_RESPONSE	128	0.673353	2.2268	3.03707e-08	3.79633e-07	2.47761e-07	800	tags=33%, list=10%, signal=30%	LAMP3/LY6E/CCL2/RTP4/CXCL10/IRF7/EIF2AK2/BST2/AXL/IFITM1/TNFAIP6/ABCA1/MSR1/TNFSF10/FFAR2/GCH1/CD40/HBEGF/IL15RA/OSM/IL15/ICOSLG/SELL/ADM/PTGIR/TNFRSF1B/LDLR/LTA/P2RY2/NMI/SPHK1/IRF1/TIMP1/CD14/CYBB/ATP2B1/MEFV/CHST2/NLRP3/HIF1A/SCARF1/TLR2	activate
HALLMARK_G2M_CHECKPOINT	137	0.578548	1.9319	0.000140373	0.00140373	0.00091612	1498	tags=41%, list=18%, signal=34%	MT2A/CDC20/CCNB2/PML/TOP2A/BUB1/CCNA2/AURKB/BIRC5/EZH2/UBE2C/CHEK1/NUSAP1/MCM2/HMMR/CUL1/ATF5/STIL/KIF2C/TTK/BARD1/PTTG1/UBE2S/KIF23/SQLE/TPX2/MARCKS/CENPA/POLQ/PRC1/HIF1A/AURKA/TROAP/RACGAP1/CHAF1A/PLK4/NOLC1/TMPO/MCM6/HMGN2/STMN1/SYNCRIP/CKS2/G3BP1/MYC/ABL1/XPO1/SFPQ/KPNB1/PLK1/SMAD3/CCND1/FBXO5/CKS1B/MAD2L1/CDKN3	activate
HALLMARK_TNFA_SIGNALING_VIA_NFKB	136	0.542441	1.80924	0.000623444	0.00519536	0.00339066	1012	tags=29%, list=12%, signal=26%	CCL2/CXCL10/IFIT2/ATF3/IFIH1/DDX58/TNFAIP6/ABCA1/TAP1/DUSP5/GCH1/HBEGF/IL15RA/GADD45B/JUN/ICOSLG/SPSB1/CD83/SLC2A6/VEGFA/IER2/LDLR/MARCKS/REL/SPHK1/IRF1/EGR1/ATP2B1/KLF4/TLR2/MAFF/TNF/TSC22D1/SOCS3/NFIL3/NINJ1/TNFAIP3/KYNU/EGR3	activate
HALLMARK_E2F_TARGETS	132	0.531315	1.76703	0.00143601	0.0102572	0.0066942	1500	tags=45%, list=19%, signal=38%	CDC20/CCNB2/TOP2A/AURKB/TK1/BIRC5/MELK/TIMELESS/EZH2/CHEK1/RAD51AP1/MCM2/HMMR/CENPM/UBE2T/CCNE1/KIF2C/RFC3/MCM4/BARD1/PTTG1/UBE2S/SHMT1/MTHFD2/BRCA1/CDCA8/DNMT1/RNASEH2A/AURKA/NBN/RACGAP1/TUBG1/PCNA/PRDX4/POLD1/PLK4/NOLC1/TMPO/NUP205/MCM6/MCM7/STMN1/SYNCRIP/CKS2/HELLS/MYC/DCK/CHEK2/XPO1/RANBP1/ATAD2/RFC2/PAICS/PLK1/TBRG4/CKS1B/MAD2L1/MLH1/CDKN3/TUBB	activate
HALLMARK_ALLOGRAFT_REJECTION	140	0.498107	1.66557	0.00230647	0.0144155	0.00940798	962	tags=26%, list=12%, signal=24%	CCL2/IRF7/CCR1/SOCS1/STAT1/TAP1/C2/HLA-DOB/CD79A/IRF4/CD40/IL15/ICOSLG/FCGR2B/CAPG/CD86/GCNT1/BRCA1/HLA-DMA/GBP2/TAP2/FASLG/TIMP1/ELF4/HLA-DRA/JAK2/GZMB/HLA-E/NLRP3/HIF1A/TLR2/TNF/CD8B/HDAC9/CD74/HLA-G/EIF4G3	activate
HALLMARK_ANGIOGENESIS	20	-0.643638	-1.76052	0.0034227	0.019015	0.0124098	525	tags=35%, list=6%, signal=33%	NRP1/SPP1/FSTL1/APP/CXCL6/THBD/PGLYRP1	suppressed
HALLMARK_KRAS_SIGNALING_DN	66	0.589858	1.74991	0.00452402	0.0217003	0.0141623	418	tags=14%, list=5%, signal=13%	IFI44L/RSAD2/MX1/TCL1A/CCNA1/VPREB1/PDCD1/TGM1/BARD1	activate
HALLMARK_IL6_JAK_STAT3_SIGNALING	62	0.589795	1.73408	0.00477406	0.0217003	0.0141623	848	tags=27%, list=10%, signal=25%	CXCL10/CD38/CCR1/SOCS1/STAT2/STAT1/IL15RA/JUN/MYD88/BAK1/TNFRSF1B/ITGA4/IRF1/CD14/TLR2/TNF/SOCS3	activate
HALLMARK_COMPLEMENT	134	0.482338	1.60621	0.00879045	0.0366269	0.0239039	805	tags=18%, list=10%, signal=16%	SERPING1/PLSCR1/IRF7/LAP3/CR2/C1QC/C1QA/C2/DUSP5/CASP5/GPD2/APOBEC3F/PSMB9/GNB4/APOBEC3G/CASP1/CASP7/GNGT2/IRF1/TIMP1/JAK2/GZMB/DUSP6/MAFF	activate
