# Supplementary material for: Identification and verification of inflammatory biomarkers for primary Sjögren’s syndrome
Source: Clin Rheumatol. 2024 Feb 20;43(4):1335–52. doi: 10.1007/s10067-024-06901-y (PMC10944815; doi:10.1007/s10067-024-06901-y)
Supplement: Supplementary file 11 — Supplementary file11 (XLSX 12 KB) [file 10067_2024_6901_MOESM11_ESM.xlsx]

## Sheet: Sheet1
Supplementary Table 7 The correlation between inflammation-associated biomarkers and differential immune cells in pSS
CXCL10
symbol	correlation	pvalue
CD56bright natural killer cell	-0.202436	0.00244037
CD56dim natural killer cell	-0.0123361	0.854976
Immature B cell	0.37557	7.5971e-09
Immature dendritic cell	0.200603	0.00267661
Memory B cell	-0.395092	1.03677e-09
Natural killer cell	0.258729	9.62598e-05
Plasmacytoid dendritic cell	-0.421619	5.57695e-11
Regulatory T cell	0.386124	2.63078e-09
Type 1 T helper cell	-0.250905	0.000158147
Type 17 T helper cell	0.300312	5.24175e-06
Type 2 T helper cell	0.32138	9.99122e-07
EIF2AK2
symbol	correlation	pvalue
CD56bright natural killer cell	-0.240452	0.000299621
CD56dim natural killer cell	-0.0920295	0.171823
Immature B cell	0.481995	2.57529e-14
Immature dendritic cell	0.0506683	0.452555
Memory B cell	-0.176683	0.00832862
Natural killer cell	0.30925	2.63531e-06
Plasmacytoid dendritic cell	-0.204669	0.00217817
Regulatory T cell	0.37332	9.4788e-09
Type 1 T helper cell	-0.0877314	0.192813
Type 17 T helper cell	0.2954	7.57592e-06
Type 2 T helper cell	0.524535	4.30102e-17
IL15
symbol	correlation	pvalue
CD56bright natural killer cell	-0.222953	0.000821717
CD56dim natural killer cell	-0.199187	0.0028731
Immature B cell	0.0944575	0.160743
Immature dendritic cell	0.127973	0.0569329
Memory B cell	-0.32484	7.51702e-07
Natural killer cell	0.183405	0.00613402
Plasmacytoid dendritic cell	-0.38626	2.59441e-09
Regulatory T cell	0.456933	7.50747e-13
Type 1 T helper cell	-0.107118	0.111477
Type 17 T helper cell	0.180579	0.0069844
Type 2 T helper cell	0.322612	9.03168e-07
LY6E
symbol	correlation	pvalue
CD56bright natural killer cell	-0.205856	0.00204959
CD56dim natural killer cell	0.0110033	0.870499
Immature B cell	0.526367	3.19971e-17
Immature dendritic cell	0.00304793	0.963982
Memory B cell	-0.187328	0.00510699
Natural killer cell	0.202263	0.00246183
Plasmacytoid dendritic cell	-0.251347	0.000153842
Regulatory T cell	0.342209	1.70675e-07
Type 1 T helper cell	-0.164109	0.0143659
Type 17 T helper cell	0.251778	0.000149741
Type 2 T helper cell	0.46057	4.6806e-13
